# Supplementary material for: Intravoxel incoherent motion (IVIM) and non-Gaussian diffusion MRI of the lactating breast
Source: PubMed Central journal article supplement — Eur J Radiol Open. 2018 Feb 2;5:24–30. doi: 10.1016/j.ejro.2018.01.003 (PMC5926247; doi:10.1016/j.ejro.2018.01.003), 2018-02-02
Supplement: mmc1.pdf [file mmc1.pdf]

## Appendix Figure

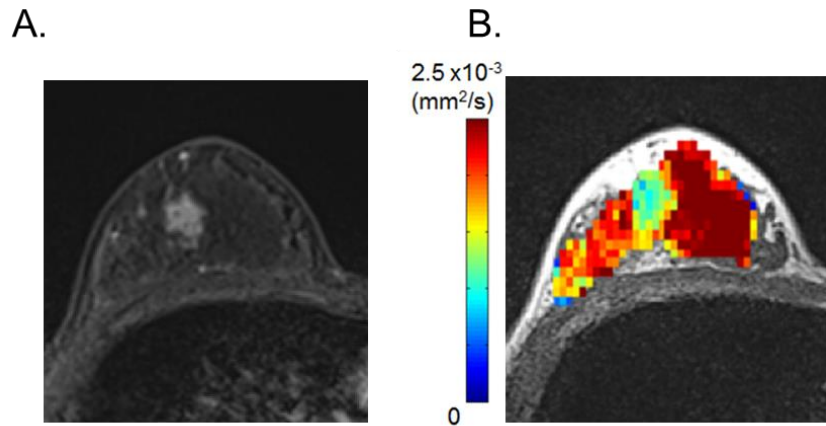

36-year-old woman in lactation with invasive ductal carcinoma.

A; contrast-enhanced (CE) image, B; ADC<sub>0</sub> map. The mass with low ADC<sub>0</sub> values (light blue) corresponds to the enhancing mass on CE image.

DWI has been acquired using 3T MRI scanner (MAGNETOM Trio, A Tim System, Siemens Healthcare, Erlangen, Germany) equipped with a dedicated 16-channel breast array coil, with the following parameters: b values [0, 5, 10, 20, 30, 50, 70, 100, 200, 400, 600, 800, 1000, 1500, 2000, 2500  $\text{sec}/\text{mm}^2$ ]; TR/TE 4600/86 ms, field of view  $160 \times 300 \text{ mm}^2$ , matrix  $80 \times 166$ , slice thickness 3.0 mm, acquisition time 3 min 55 sec; GRAPPA with acceleration factor of 2.
